# Supplementary material
Source: publisher figshare collection journal article supplement (https://gsajournals.figshare.com/ndownloader/files/17502335)
Supplement: Supplementary file 1 [file 17502335]

## Sheet: Table S4
TABLE S4 | Identification of Ont7716 Cf-11-carrying only progeny. Phenotypic scores of selfed progeny from a (Cf0 x Ont7716) x Cf0 cross, following infection with C. fulvum race 5 that is restricted in the presence of Cf-4 or Cf-11. Plants were scored at 14 dpi. Family number, numbers of resistant and susceptible plants are shown, along with the p-values of a chi-square test for a 3:1 segregation…
Family	Resistant	Susceptible	3:1 ratio p-value(χ2)
J469	46	2	0.0038**
J471	29	16	0.276
J472	43	2	0.0059**
J473	46	0	2.886e-04***
J474	31	14	0.519
J476	31	16	0.337
J478	35	13	0.816
